# Supplementary material for: Dynamic Vascular Imaging Using Active Breast Thermography
Source: MDPI journal article supplement (doi:10.3390/s23063012), 2023-03-10

## Supplementary Materials

Patient 282: Left-sick. Location: inner lower quadrant.

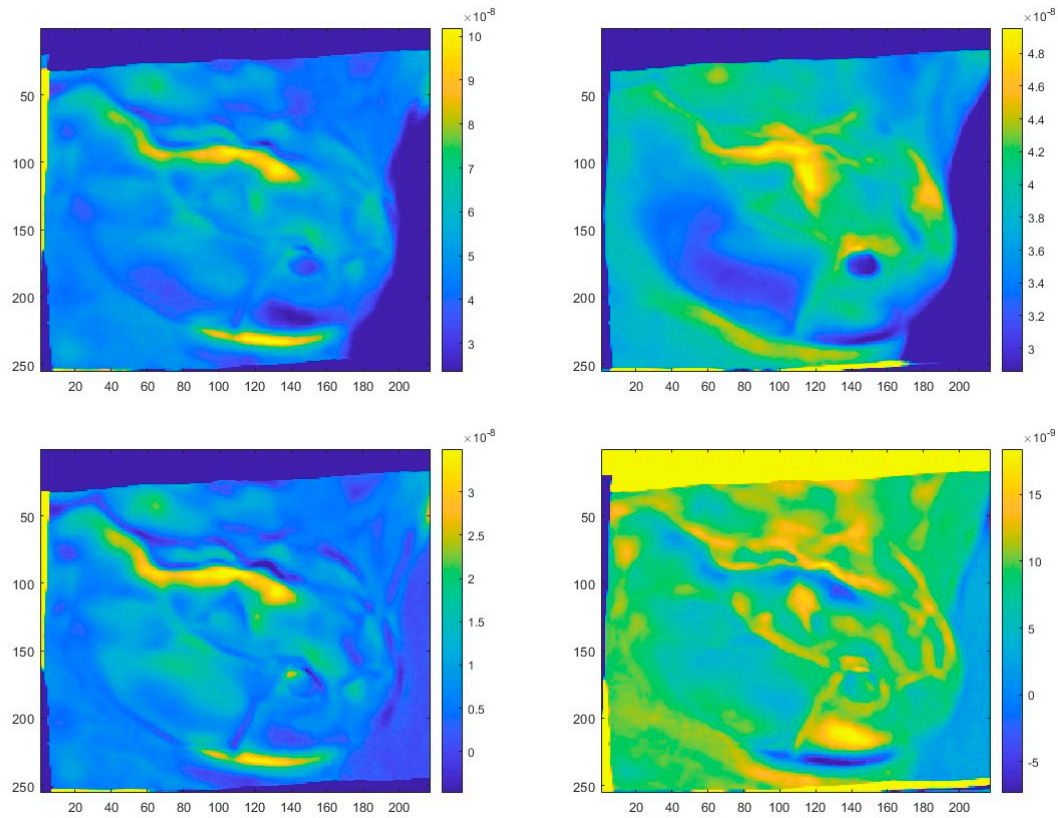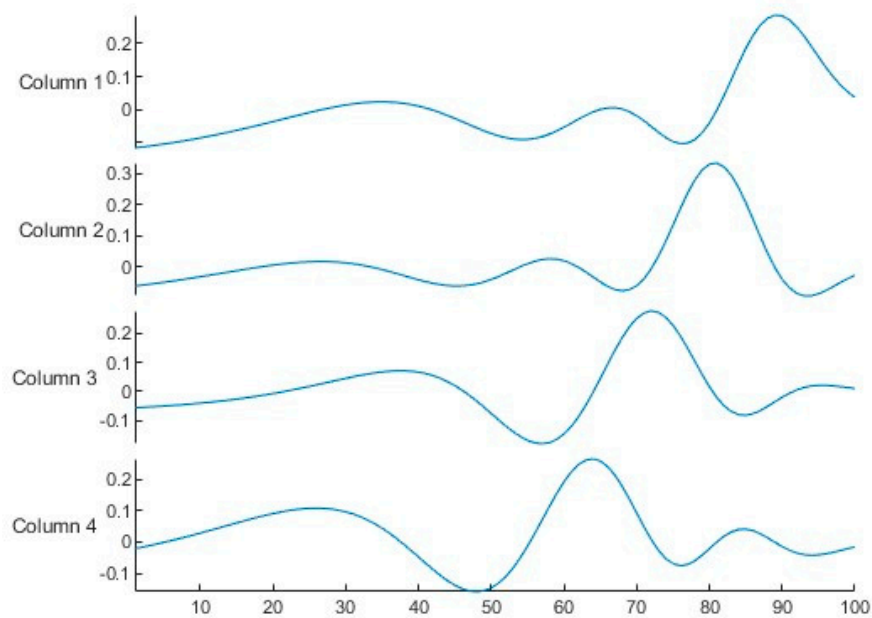

Supplementary material Patient 282: Right-healthy.

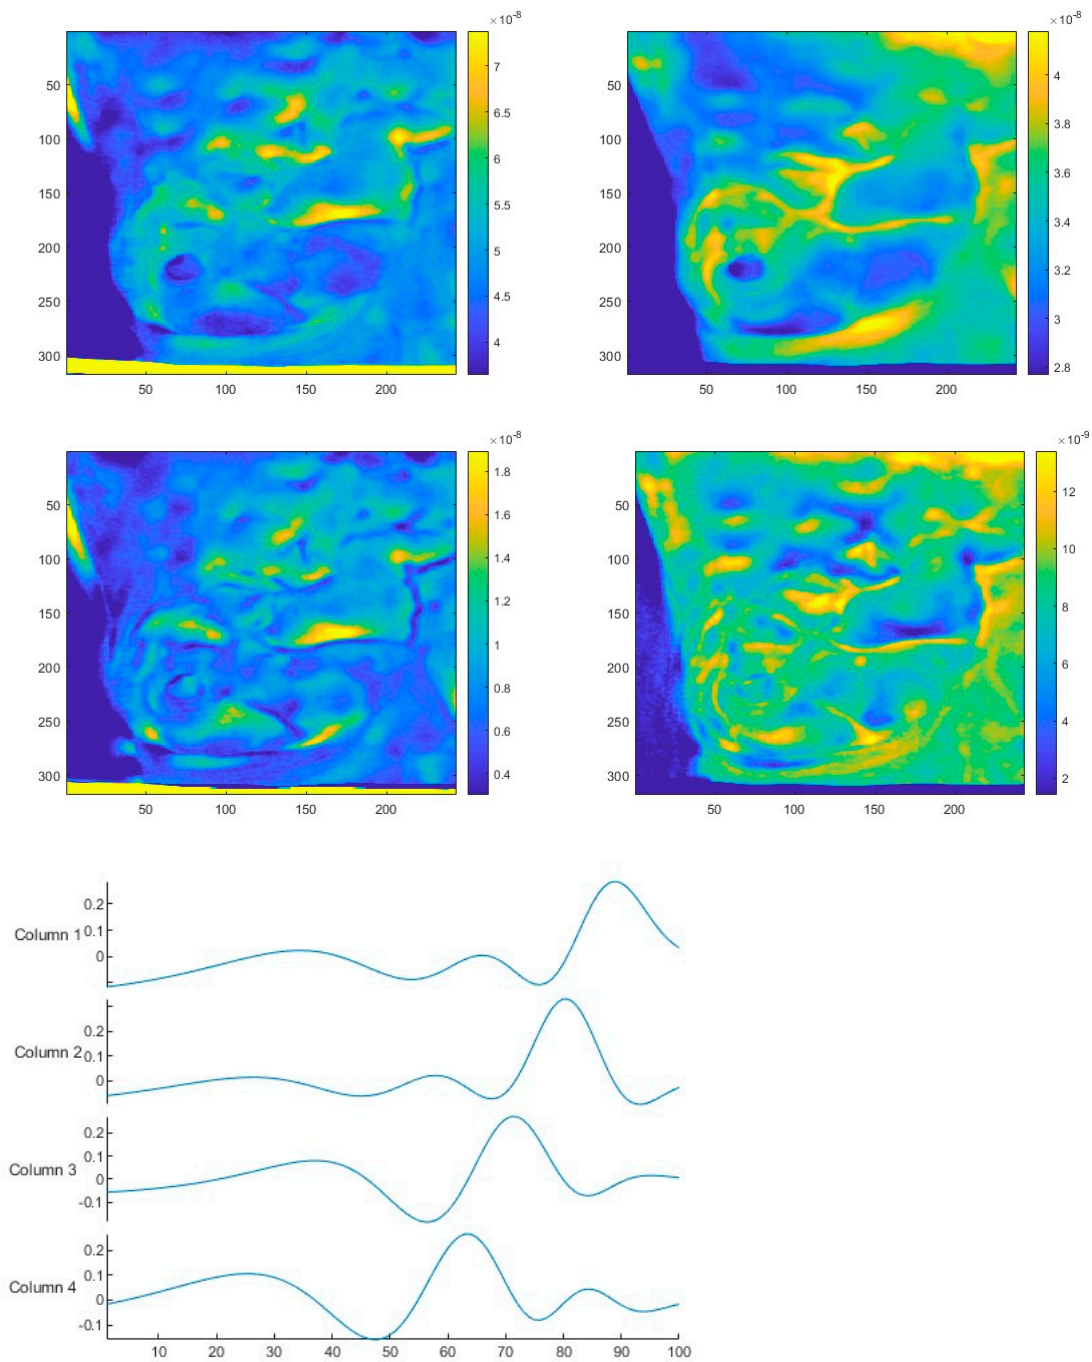

Supplementary material Patient 285: Left-healthy.

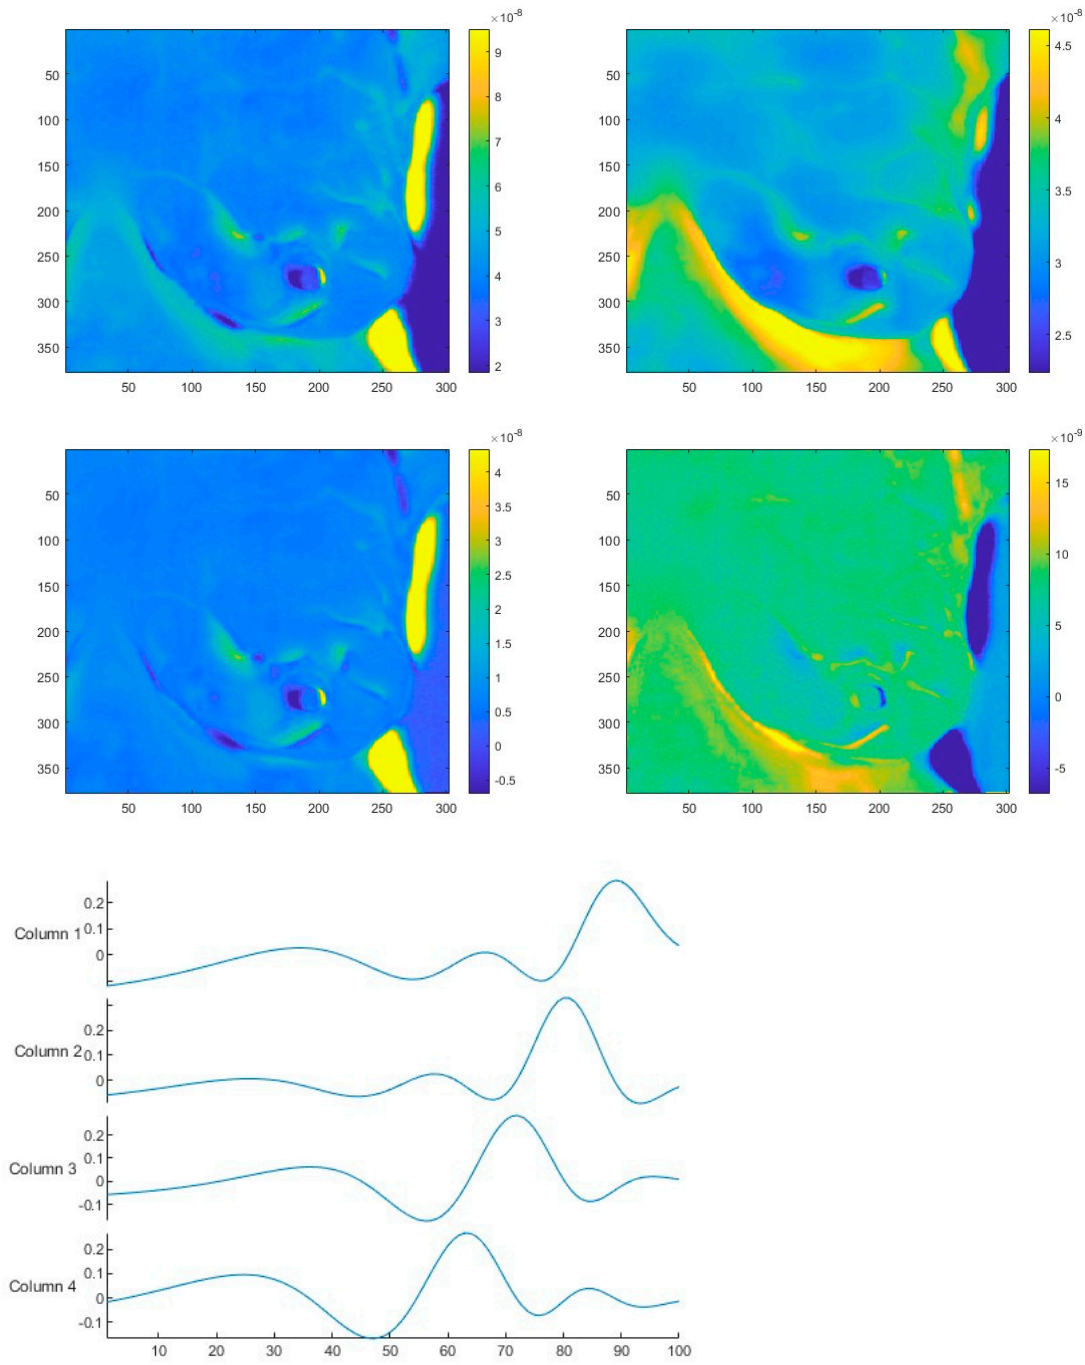

Patient 285: Right-sick. Location: outer lower quadrant.

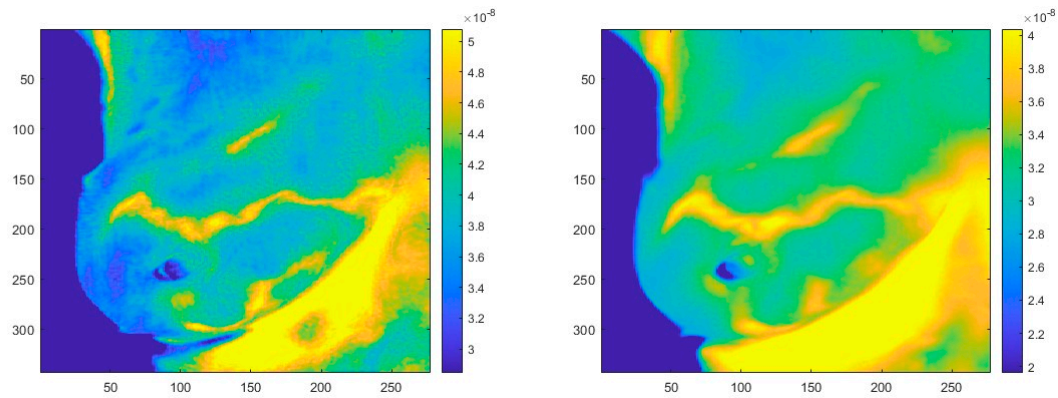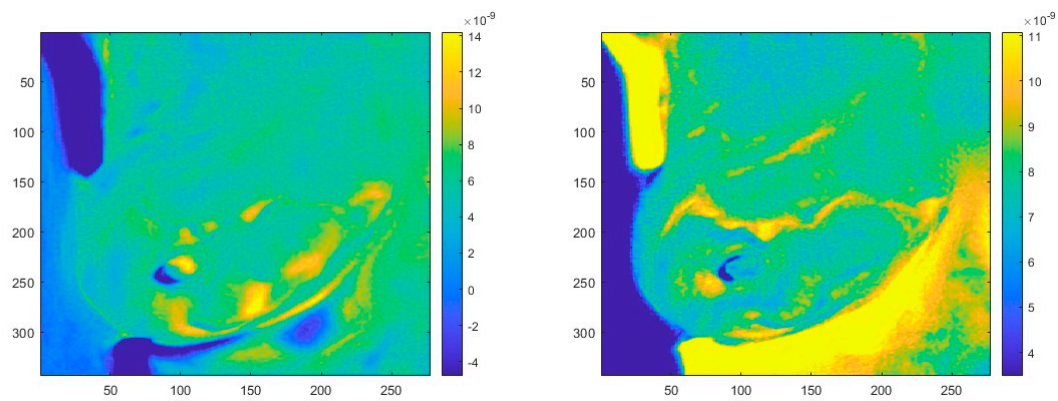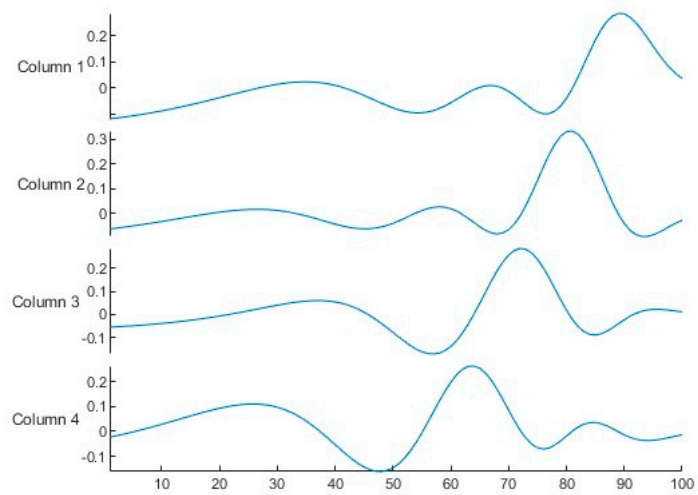



Supplementary material Patient 286: Left-sick. Location: upper outer quadrant.

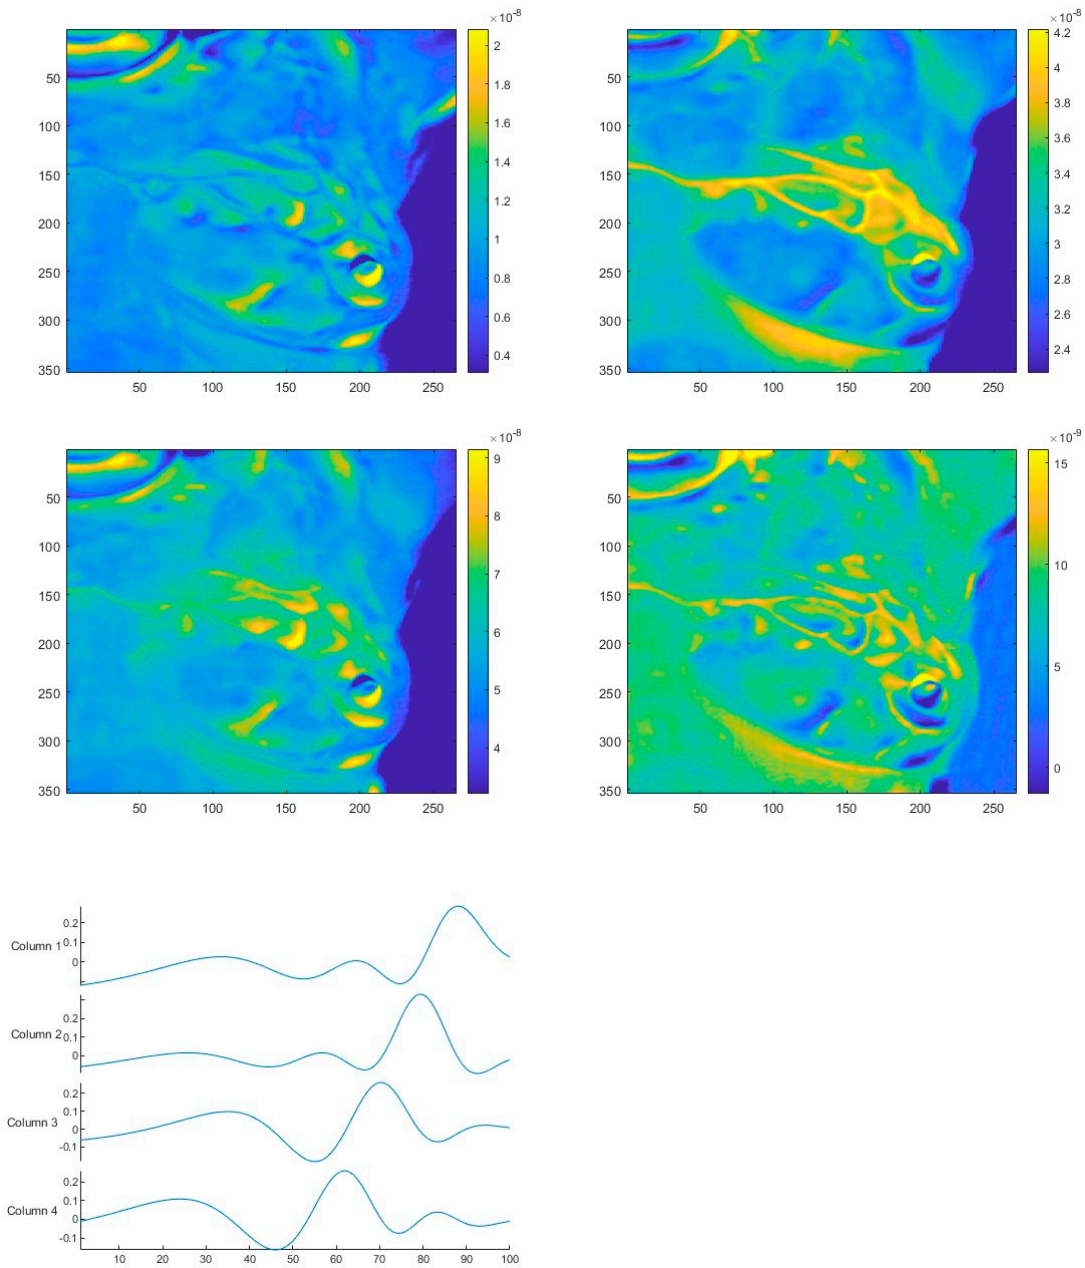

Patient 286: Right-healthy.

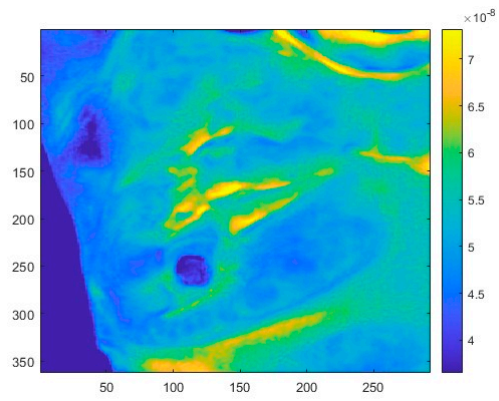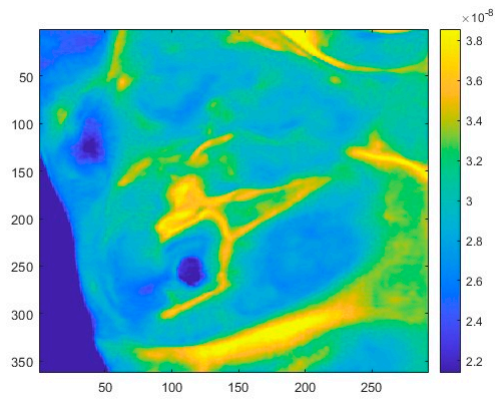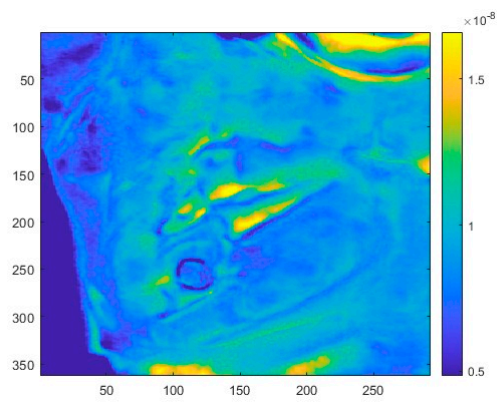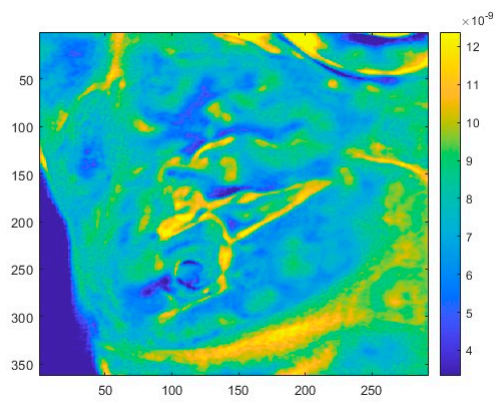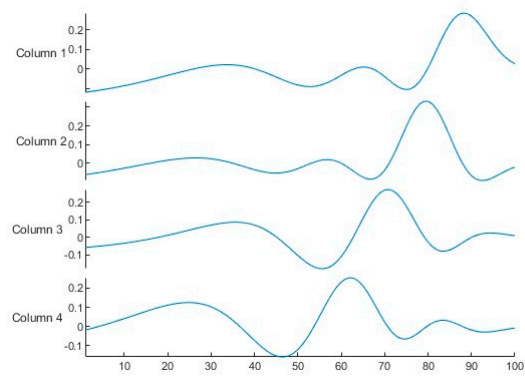

Supplement: s1 [file s1]
